# Supplementary material
Source: PubMed Central journal article supplement (PMC5819349)
Supplement: NIHMS942370-supplement-Supplemental_materials.pdf [file NIHMS942370-supplement-Supplemental_materials.pdf]

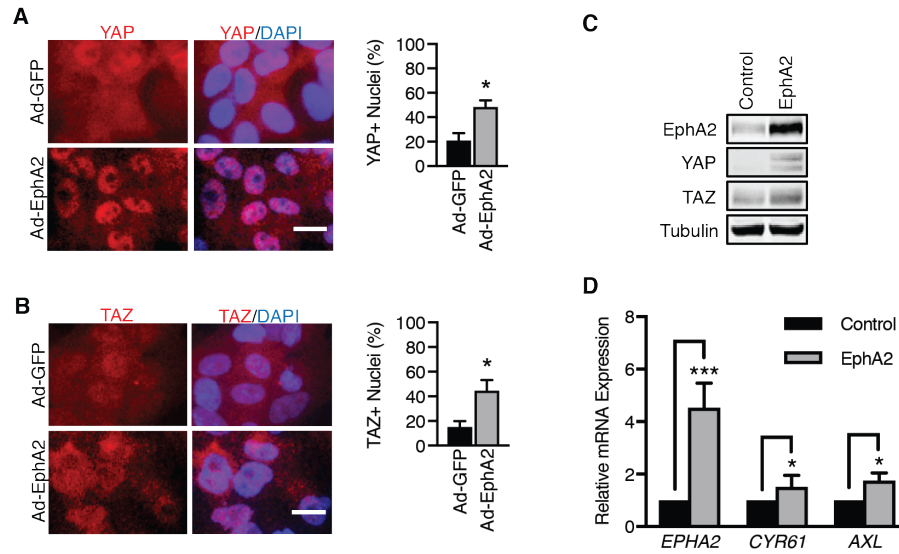

**Supplemental Figure 1. EphA2 activates YAP/TAZ in MCF10A-HER2 cells.** A,B) Immunofluorescence of (A) YAP or (B) TAZ (both red) in MCF10A-HER2 cells infected with Ad-GFP or Ad-EphA2. Nuclei were stained with DAPI (blue). The percentage of nuclei with YAP or TAZ nuclear localization (YAP+ or TAZ+) were determined using ImageJ software. Data were compiled from three views per sample and three independent experiments. Error bars are SEM, and scale bars are 10  $\mu$ m. \* $p$ <0.05; Student's t-test. C) Western blot of EphA2 overexpression in MCF10A-HER2-EphA2 cells. D) Relative mRNA expression was measured in MCF10A-HER2 ("Control") or MCF10A-HER2-EphA2 ("EphA2") cells by qRT-PCR from five independent experiments. Error bars are SEM. \* $p$ <0.05, \*\*\* $p$ <0.005; Student's t-test.

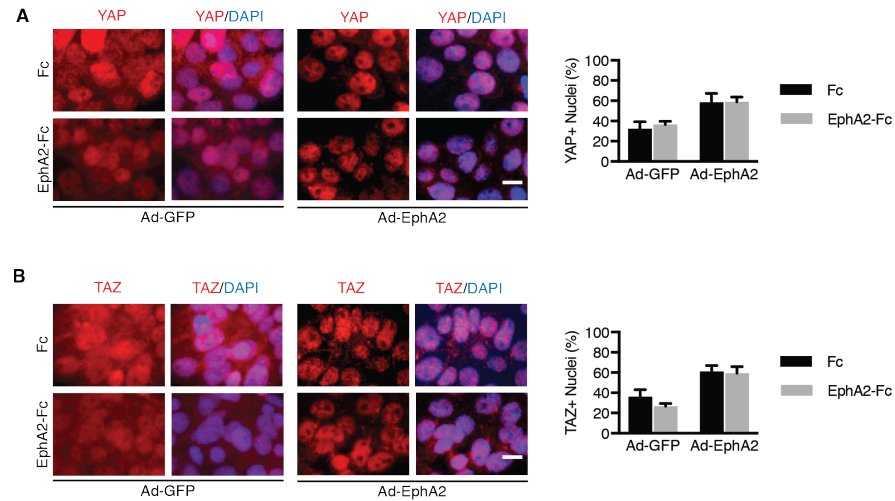

**Supplemental Figure 2. EphA2-EphrinA1 interactions do not significantly contribute to YAP/TAZ activation.** A,B) Immunofluorescence of (A) YAP or (B) TAZ in *MMTV-Neu* cells infected with Ad-GFP or Ad-EphA2 followed by incubation with the control Fc or a EphA2-Fc chimeric protein. YAP or TAZ positive nuclei were counted using three fields of view from three independent experiments. Error bars are SEM, and scale bars are 10  $\mu$ m.

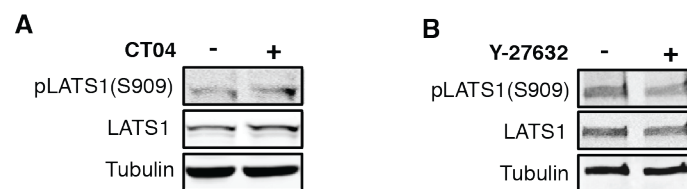

**Supplemental Figure 3. Rho and ROCK inhibition did not enhance LATS1 phosphorylation in *MMTV-Neu* cells.** Western blot analysis of *MMTV-Neu* cells treated with PBS control, (A) CT04 (3  $\mu\text{g/mL}$ ), or (B) Y-27632 (10  $\mu\text{M}$ ) for 6 hrs.

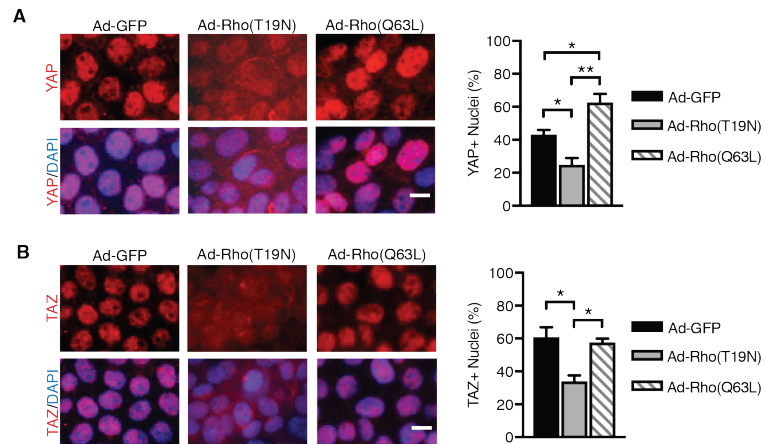

**Supplemental Figure 4. EphA2-mediated YAP/TAZ activation requires Rho catalytic activity.**

Immunofluorescence of (A) YAP or (B) TAZ (both red) and DAPI (blue) in *MMTV-Neu* cells infected with Ad-EphA2 and Ad-GFP, Ad-Rho(T19N), or Ad-Rho(Q63L). Scale bar is 10  $\mu$ m. DAPI-stained nuclei were counted in ImageJ, and YAP- or TAZ-positive nuclei were counted using at least two fields of view in three independent experiments. Error bars are SEM. \* $p < 0.05$ , \*\* $p < 0.01$ ; one-way ANOVA, Tukey's post hoc.

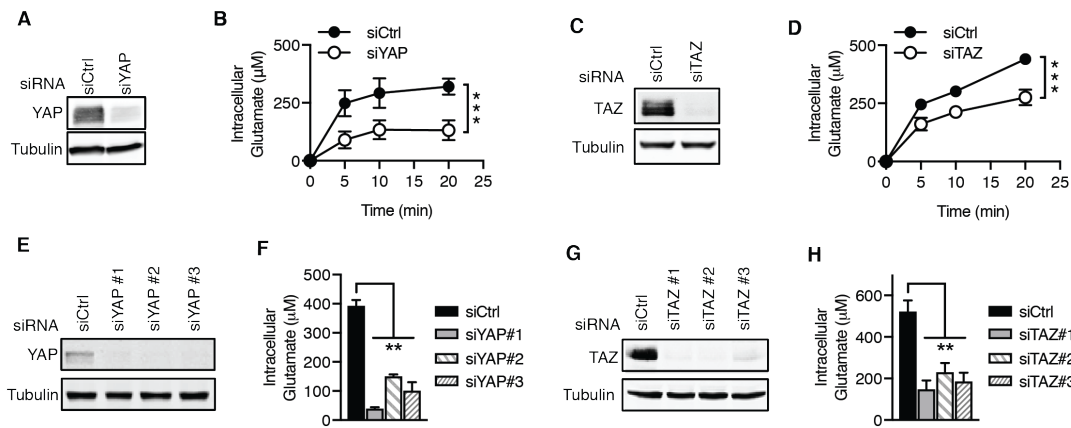

**Supplemental Figure 5. YAP and TAZ promote glutamine metabolism in MCF10A-HER2-EphA2 cells.** A,C) *YAP* (A) or *TAZ* (C) knockdown using pooled siRNAs in MCF10A-HER2-EphA2 cells by Western blot. Non-targeting (siCtrl) siRNA was used as a control. B,D) Intracellular glutamate concentration (μM) measured at 0, 5, 10, and 20 min after addition of serum (5%), EGF (20 ng/mL), and L-glutamine (2.5 mM) in cells described in (B) and (D). Data from three independent experiments was normalized to the 0 min time point, and error bars are SEM. \*\*\*p<0.005; two-way ANOVA. E,G) Western blot analysis to demonstrate (E) *YAP* or (G) *TAZ* knockdown in MCF10A-HER2-EphA2 cells transfected with individual siRNAs. Control cells were transfected with a non-targeting (siCtrl) control. F,H) Intracellular glutamate concentration (μM) measured 20 minutes after addition of serum (5%), EGF (20 ng/mL), and L-glutamine (2.5 mM) in cells described in (E) and (G). Error bars are SEM calculated from three independent experiments. \*\*p<0.01; one-way ANOVA; Dunnett's post hoc.

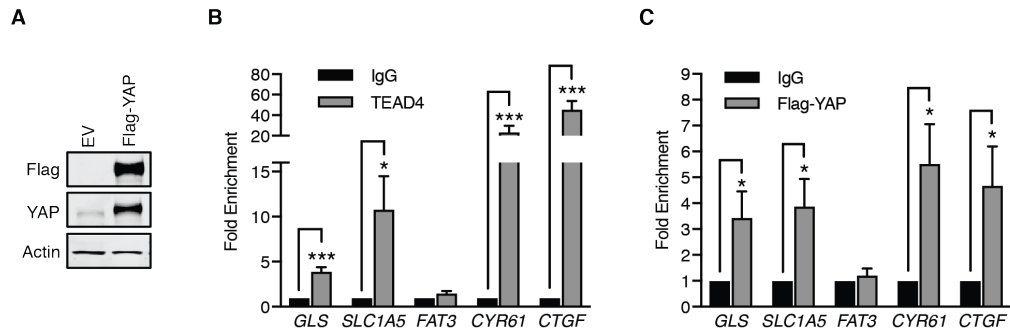

**Supplemental Figure 6. YAP and TEAD4 are associated with *GLS* and *SLC1A5* promoters.** A) Western blot of Flag-YAP overexpression in MCF10A-HER2 cells. Actin was assessed as a loading control. B,C) Chromatin immunoprecipitation of MCF10A-HER2 cells transduced to express Flag-YAP. Relative immunoprecipitated genomic DNA using (B) TEAD4 or (C) Flag was determined by qRT-PCR and normalized to IgG controls from six independent experiments. Error bars represent SEM. \* $p < 0.05$ , \*\*\* $p < 0.005$ ; Student's t-test.

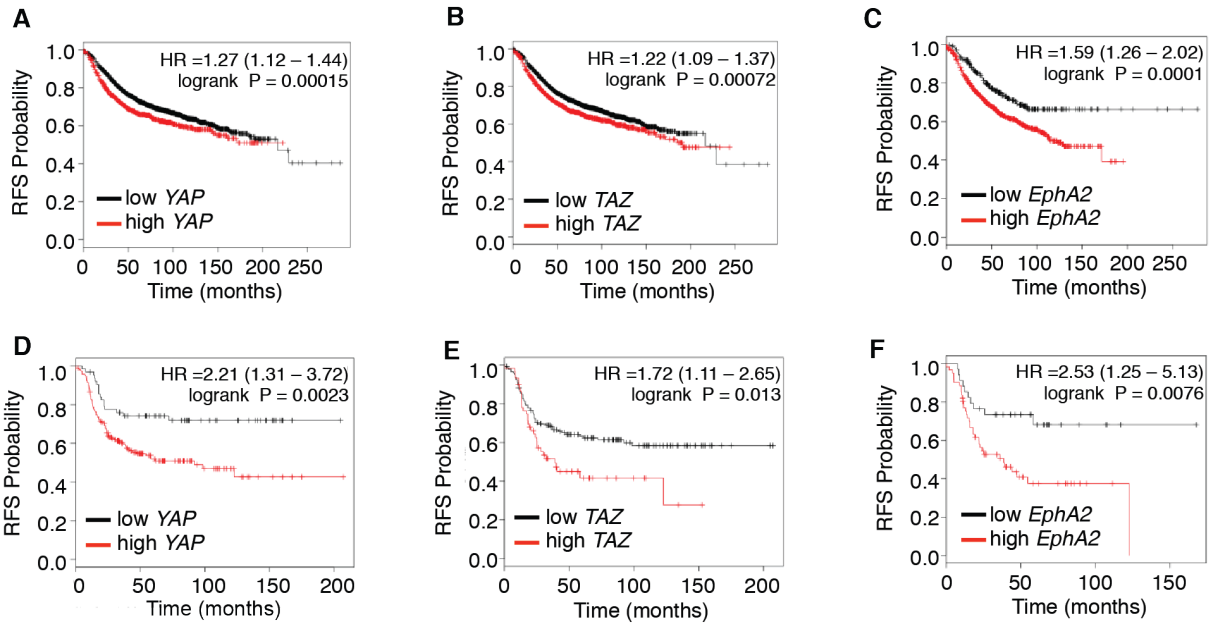

**Supplemental Figure 7. *YAP/TAZ* and *EphA2* expression strongly correlate with decreased patient survival in HER2+ breast cancer.** Kaplan-Meier analysis of recurrence-free survival (RFS) in (A-C) all or (D-F) only HER2+ breast cancer patients exhibiting low (black) or high (red) expression of (A,D) *YAP* (all: n=1764; HER2+: n=156), (B,E) *TAZ* (all: n=3951; HER2+: n=251), or (C,F) *EphA2* (all: n=1133; HER2+: n=95 in lymph-node positive patients only).

**Supplemental Table 1. ChIP Primers**

| Gene   | Forward Primer         | Reverse Primer         |
|--------|------------------------|------------------------|
| GLS    | AGGCACGTGTAGAGCCATCT   | AGCTGGTCCCTTATGCAAAC   |
| SLC1A5 | GTGCTAGCCCTGAGGCATTG   | ATGCAAGCTGTCCAGGGTAT   |
| FAT3*  | GGCTTCCACTTCACACATTCC  | TGCCCATTCTACTCTGGCTGTT |
| CYR61* | CACACACAAAGGTGCAATGGAG | CCGGAGCCCGCCTTTTATAC   |
| CTGF†  | GGAGTGGTGCGAAGAGGATA   | GCCAATGAGCTGAATGGAGT   |

\* Zancanato F *et al. Nature Cell Biology* 17: 1218-1227 (2015).

† Zhang H *et al. J Biol Chem* 284: 13355-13362 (2009).

**Supplemental Video 1. EphA2 overexpression leads to intranuclear accumulation of YAP.** Super-resolution microscopy of YAP subcellular localization in a *MMTV-Neu* cell infected with Ad-GFP (left) or Ad-EphA2 (right). DAPI nuclear stain (blue) and YAP immunofluorescence (red) are shown. Each 2D image is shown along the x-y plane, with signal intensity plotted along the z-axis. The video loop was compiled in ImageJ using six consecutive z-stack images.

**Supplemental Video 2. Nuclear exclusion of YAP upon Rho inhibition.** Super-resolution microscopy of YAP subcellular localization in a *MMTV-Neu* cell infected with Ad-EphA2 and treated with PBS (Control; left) or (CT04 3  $\mu\text{g/mL}$  for 4 hrs; right). DAPI nuclear stain (blue) and YAP immunofluorescence (red) are shown. Each 2D image is shown along the x-y plane, with signal intensity plotted along the z-axis. The video loop was compiled in ImageJ using seven consecutive z-stack images.
